# Supplementary material for: In situ Fe isotopic analyses of fourteen reference materials using a synthetic Cr standard for mass bias and isobaric interference corrections by femtosecond LA-MC-ICP-MS
Source: Royal Society of Chemistry journal article supplement (doi:10.1039/d0ja00465k), 2021-01-01

**Table S1** Major element and Cr isotopic compositions of the synthetic Cr-979S standard determined by EPMA, ICP-MS and SEMS.

|                                    | Value                    | Uncertainty | n   | method            | Reference                                  |
|------------------------------------|--------------------------|-------------|-----|-------------------|--------------------------------------------|
| SiO <sub>2</sub>                   | 66.0%                    | 1.15%       | 108 | EPMA              | Our study <sup>a</sup>                     |
| TiO <sub>2</sub>                   | 2.89%                    | 4.67%       | 108 | EPMA              | Our study <sup>a</sup>                     |
| Al <sub>2</sub> O <sub>3</sub>     | 13.76%                   | 2.02%       | 108 | EPMA              | Our study <sup>a</sup>                     |
| MgO                                | 5.42%                    | 2.83%       | 108 | EPMA              | Our study <sup>a</sup>                     |
| CaO                                | 7.20%                    | 2.88%       | 108 | EPMA              | Our study <sup>a</sup>                     |
| Na <sub>2</sub> O                  | 2.51%                    | 6.74%       | 108 | EPMA              | Our study <sup>a</sup>                     |
| Cr <sub>2</sub> O <sub>3</sub>     | 1.32%                    | 20.5%       | 108 | EPMA              | Our study <sup>a</sup>                     |
| Cr                                 | 11461 µg g <sup>-1</sup> | 6.77%       | 3   | ICP-MS            | Our study <sup>b</sup>                     |
| <sup>50</sup> Cr/ <sup>52</sup> Cr | 0.051859                 | ±0.000100   |     | SEMS <sup>c</sup> | Shields <i>et al.</i> (1966) <sup>58</sup> |
| <sup>53</sup> Cr/ <sup>52</sup> Cr | 0.113386                 | ±0.000145   |     | SEMS <sup>c</sup> | Shields <i>et al.</i> (1966) <sup>58</sup> |
| <sup>54</sup> Cr/ <sup>52</sup> Cr | 0.028222                 | ±0.000059   |     | SEMS <sup>c</sup> | Shields <i>et al.</i> (1966) <sup>58</sup> |

<sup>a</sup>Major element compositions of the synthetic Cr-979S standard were conducted on a JEOL JXA-8100 electron microprobe (EPMA) with a beam size of 10 µm, an accelerating voltage of 15 kV and a beam current of 20 nA at the Institute of Geology and Geophysics, Chinese Academy of Sciences (IGGCAS).

<sup>b</sup>The concentration of Cr was determined by solution ICP-MS (7500a, Agilent) at the Institute of Geology and Geophysics, Chinese Academy of Sciences (IGGCAS).

<sup>c</sup>SEMS is the abbreviation for surface emission mass spectrometry.

**Figure S1** Fe isotopic compositions measured by fs LA-MC-ICPMS in two grains of BCR-2G glasses mounted in different positions of the two-volume ablation cell (5000 cm<sup>3</sup> with a super-high-sensitivity sample cup of 1.6 cm<sup>3</sup>).  $\delta^{56}\text{Fe}_{\text{BCR-2G}}$  presents that  $\delta^{56}\text{Fe}$  values of sample BCR-2G are reported relative to BCR-2G as reference standard. The red triangles represent average values in each group. The red line represents the theoretical value of  $\delta^{56}\text{Fe}_{\text{BCR-2G}} = 0$ . Error bars are 2SE for individual measurements and 2SD for average values.

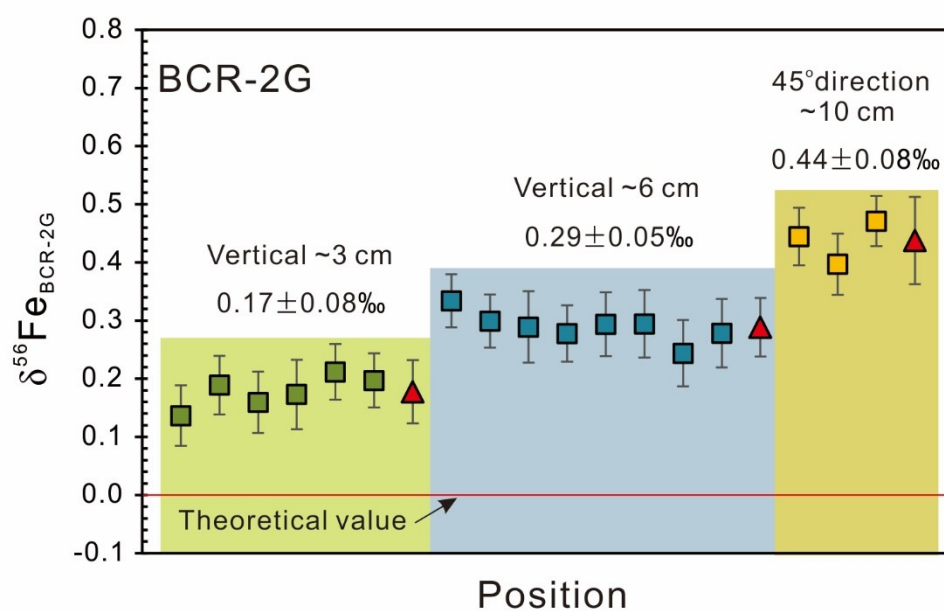

**Figure S2** The homogeneity of Cr isotopic compositions of Cr-979S standard measured by fs LA-MC-ICPMS along a horizontal profile with a length of 8 millimeters.  $\delta^{53}\text{Cr}_{\text{Cr-979S}}$  presents that  $\delta^{53}\text{Cr}$  values of the Cr-979S standard are reported relative to the Cr-979S standard as reference standard. The red triangle represents the average  $\delta^{53}\text{Cr}_{\text{Cr-979S}}$  value of the Cr-979S standard. The red line represents the theoretical value of  $\delta^{53}\text{Cr}_{\text{Cr-979S}} = 0$ . Error bars are based on 2SE for individual measurements and 2SD for average value.

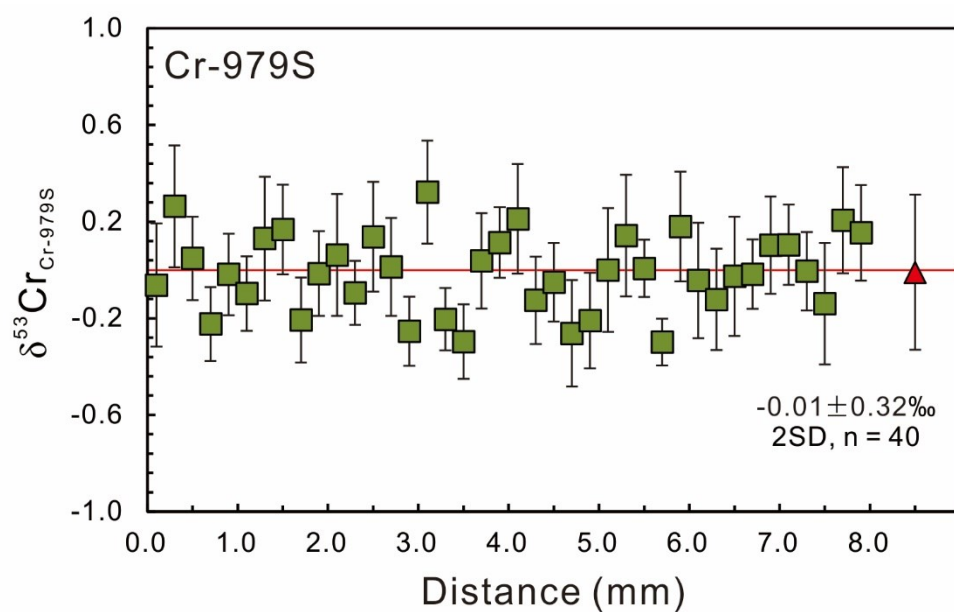

Supplement: d0ja00465k1.pdf [file d0ja00465k1.pdf]
